# Supplementary material for: The rational design of carbon coated Fe2(MoO4)3nanosheets for lithium-ion storage with high initial coulombic efficiency and long cycle life
Source: Royal Society of Chemistry journal article supplement (doi:10.1039/d0na00122h), 2020-01-01
Supplement: d0na00122h1.pdf [file d0na00122h1.pdf]

**Rational design of carbon coated  $\text{Fe}_2(\text{MoO}_4)_3$  nanosheet for lithium-ion storage  
with high initial Coulombic efficiency and long cycle life**

*Chennan Liang<sup>a</sup>, Yuanxue Tao<sup>a</sup>, Dekang Huang<sup>a</sup>, Shu Li<sup>a</sup>, Feifei Cao<sup>a</sup>, Yanzhu Luo<sup>a,\*</sup>,  
Hao Chen<sup>a,\*</sup>*

<sup>a</sup> College of Science, Huazhong Agricultural University, Wuhan 430070, PR China

Email: hchenhao@mail.hzau.edu.cn; luoyanzhu@mail.hzau.edu.cn

**Supplementary Figures**

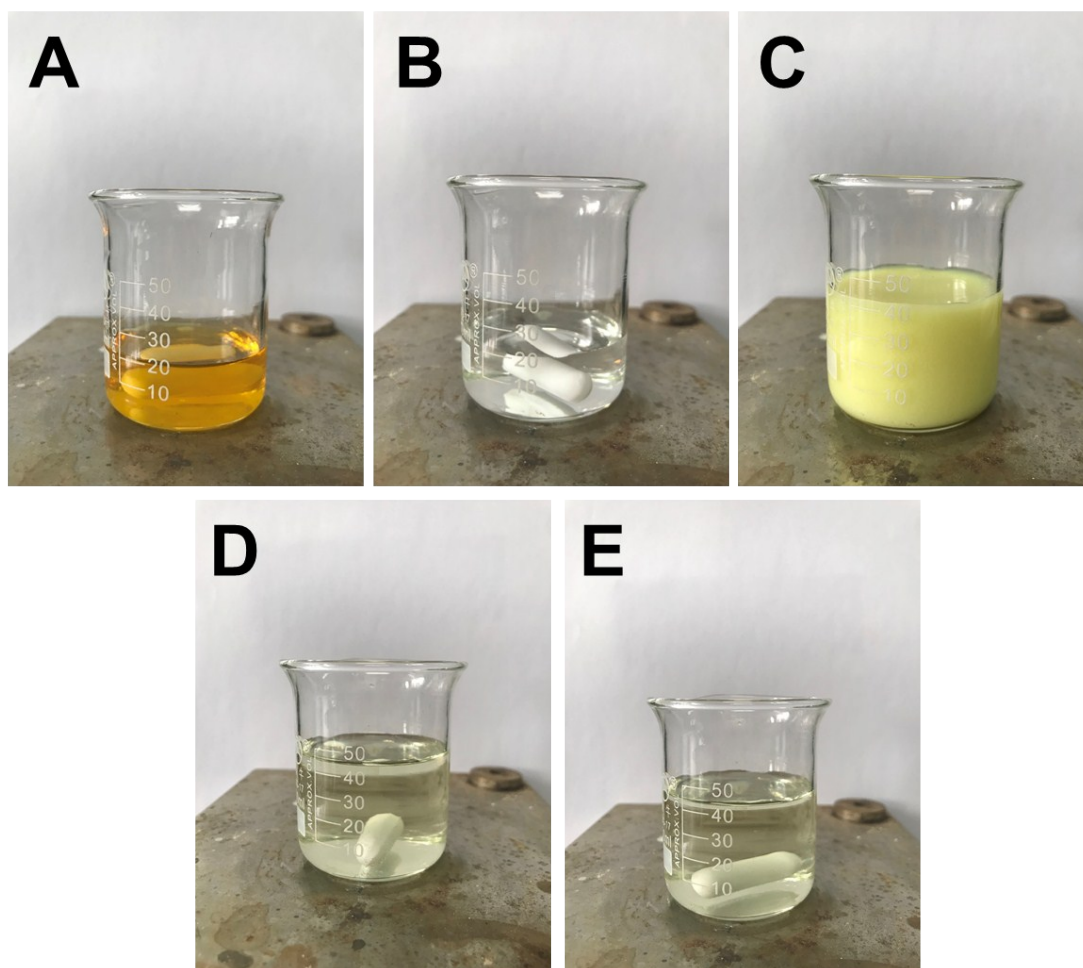

**Fig. S1** Photograph of reaction solution at different stages: (A)  $\text{Fe}(\text{NO}_3)_3 \cdot 9\text{H}_2\text{O}$  aqueous solution. (B)  $(\text{NH}_4)_6\text{Mo}_7\text{O}_{24} \cdot 4\text{H}_2\text{O}$  aqueous solution. (C) Suspension obtained after the mixture of  $(\text{NH}_4)_6\text{Mo}_7\text{O}_{24} \cdot 4\text{H}_2\text{O}$  and  $\text{Fe}(\text{NO}_3)_3 \cdot 9\text{H}_2\text{O}$  solution. (D) Transparent

solution obtained after the addition of 2 mL  $\text{HNO}_3$ . (E) Transparent solution obtained after the addition of 1 g urea.

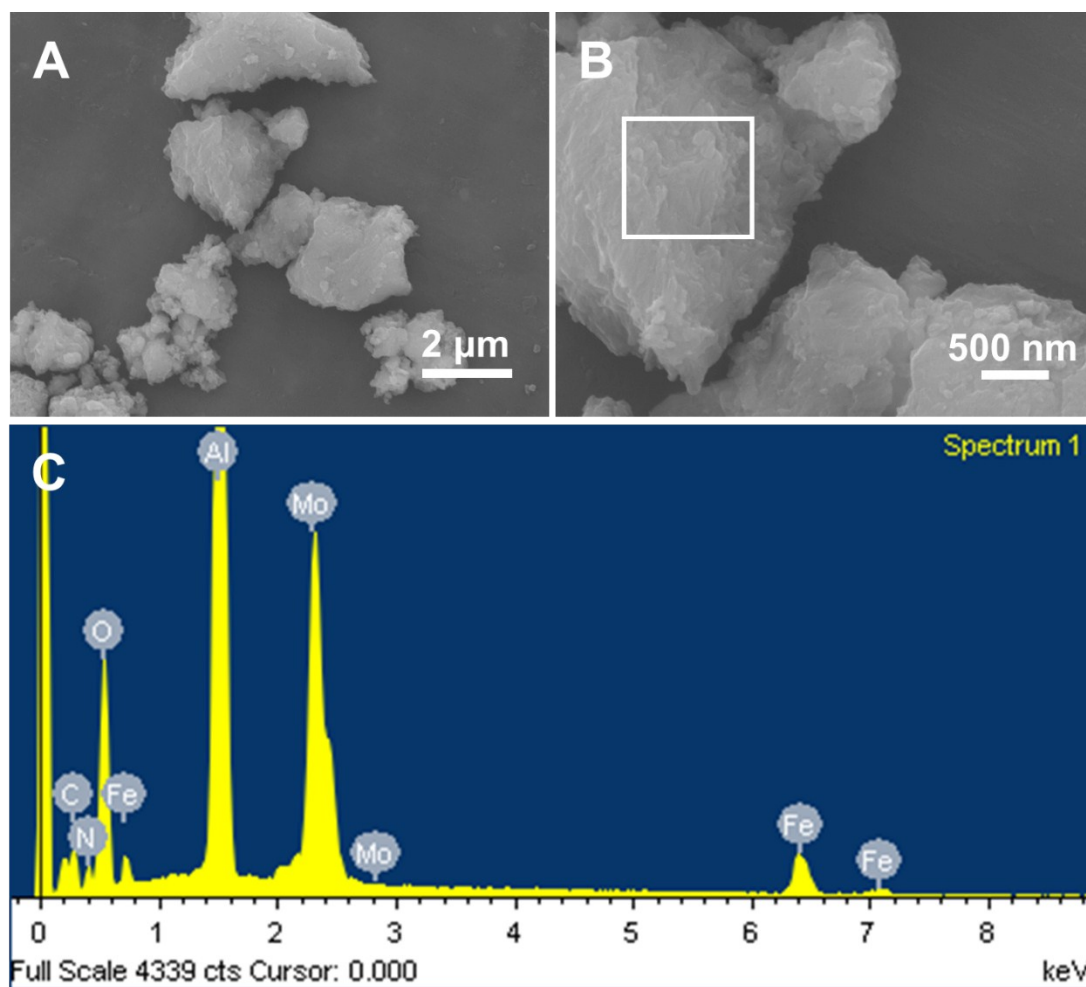

**Fig. S2** SEM images (A, B) and corresponding EDS result (C) of intermediate yellow precipitations.

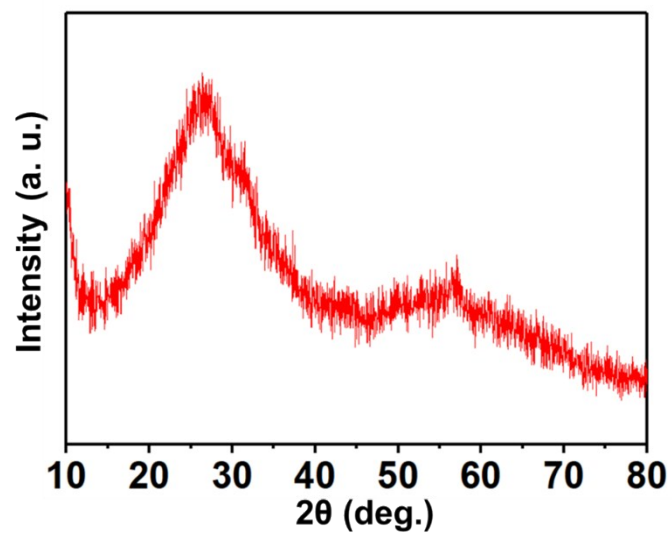

**Fig. S3** XRD pattern of intermediate yellow precipitations.

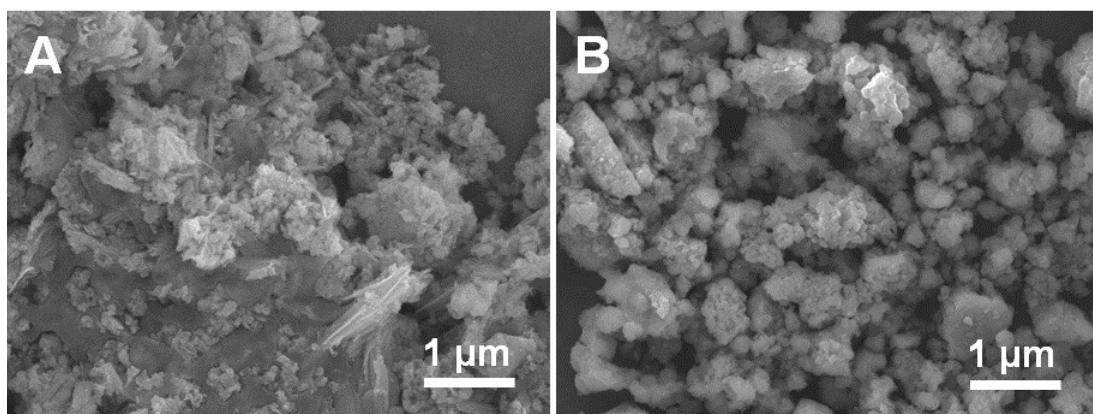

**Fig. S4** SEM images of  $\text{Fe}_2(\text{MoO}_4)_3/\text{C-NS}$  precursor (A) and  $\text{Fe}_2(\text{MoO}_4)_3\text{-MP}$  precursor (B).

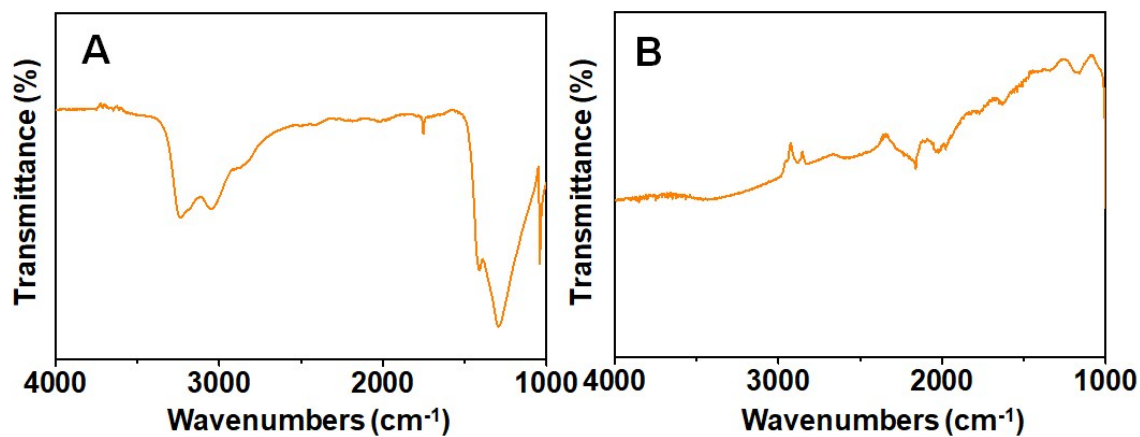

**Fig. S5** (A) FT-IR spectroscopy of  $\text{Fe}_2(\text{MoO}_4)_3/\text{C-NS}$  precursor. (B) FT-IR spectroscopy of  $\text{Fe}_2(\text{MoO}_4)_3/\text{C-NS}$  sample.

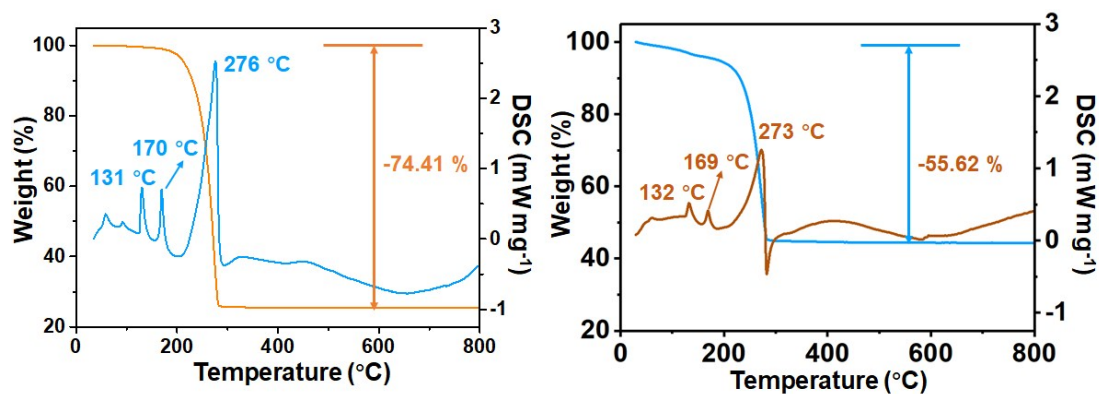

**Fig. S6** TG and DSC of  $\text{Fe}_2(\text{MoO}_4)_3/\text{C-NS}$  precursor (A) and  $\text{Fe}_2(\text{MoO}_4)_3\text{-MP}$  precursor (B).

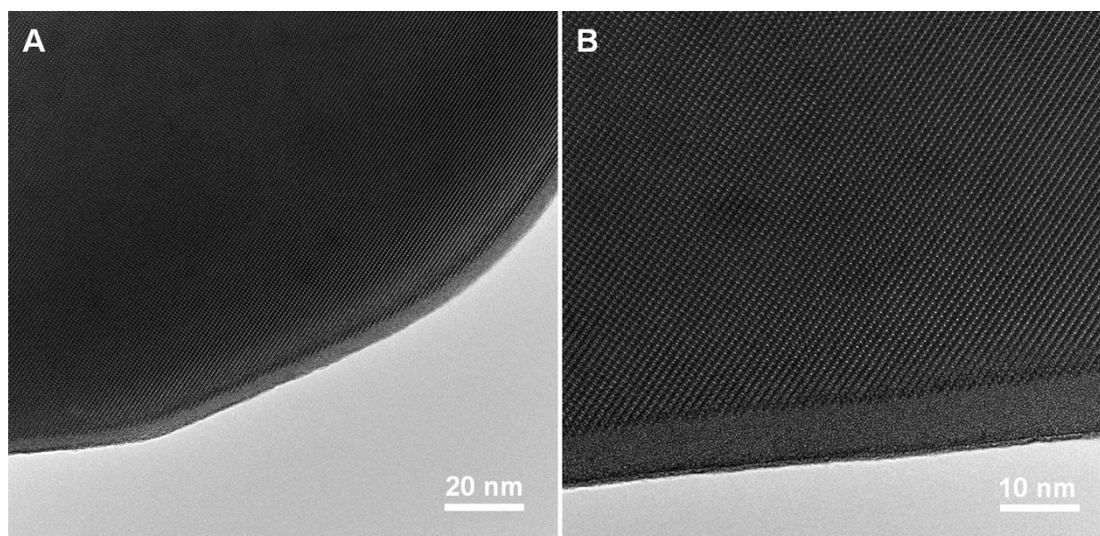

**Fig. S7** The HRTEM images of  $\text{Fe}_2(\text{MoO}_4)_3/\text{C-NS}$  (A, B).



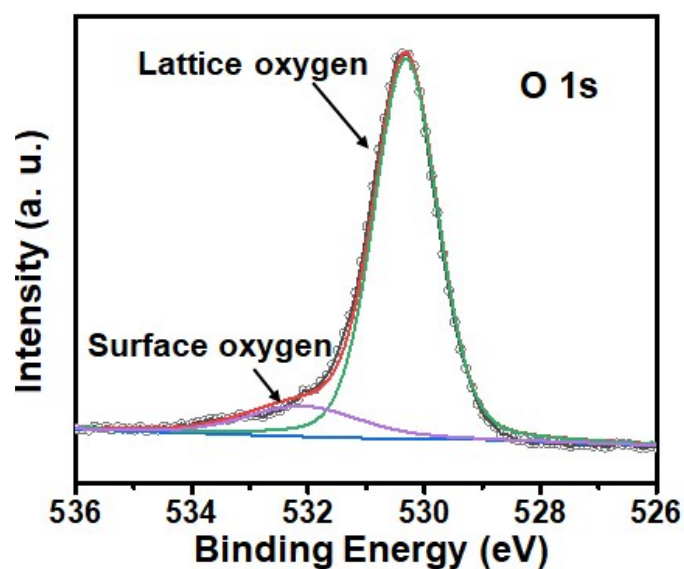

**Fig. S8** High-resolution O 1s XPS spectrum of  $\text{Fe}_2(\text{MoO}_4)_3/\text{C-NS}$ .

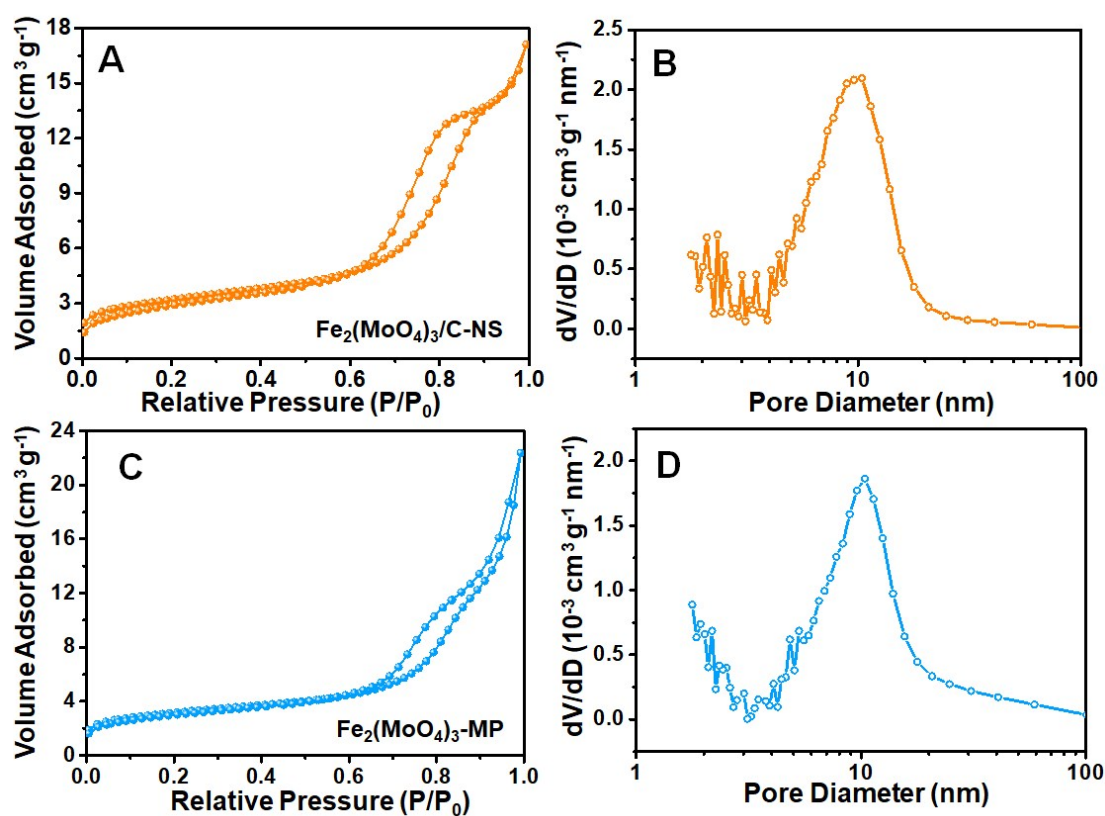

**Fig. S9** The  $\text{N}_2$  adsorption-desorption isotherms and corresponding BJH pore size distribution curves. (A, B)  $\text{Fe}_2(\text{MoO}_4)_3/\text{C-NS}$  sample. (C, D)  $\text{Fe}_2(\text{MoO}_4)_3\text{-MP}$  sample.

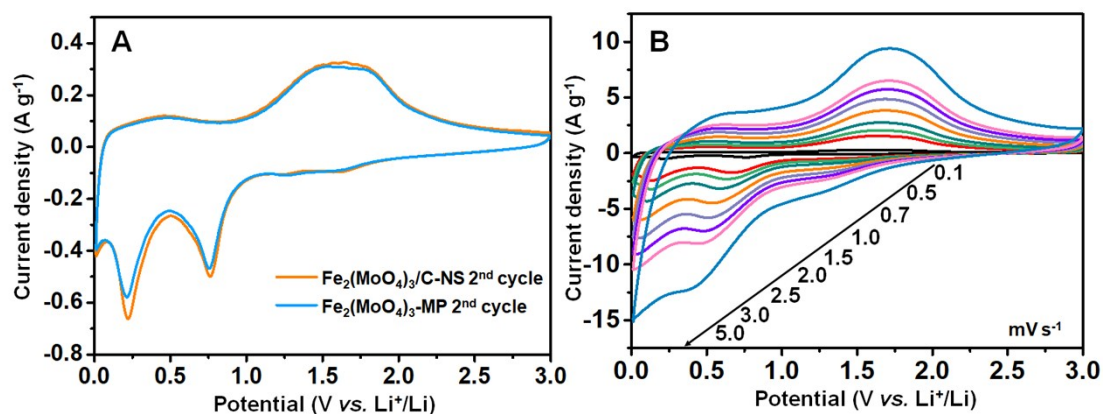

**Fig. S10** (A) The second cycle of the cyclic voltammetry curves of  $\text{Fe}_2(\text{MoO}_4)_3/\text{C-NS}$  and  $\text{Fe}_2(\text{MoO}_4)_3\text{-MP}$  at  $0.1 \text{ mV s}^{-1}$  in the potential range from 0.01 to 3.0 V vs.  $\text{Li}^+/\text{Li}$ . (B) Cyclic voltammetry curves of  $\text{Fe}_2(\text{MoO}_4)_3/\text{C-NS}$  at different scan rates from 0.1 to  $5 \text{ mV s}^{-1}$  in the potential range from 0.01 to 3.0 V vs.  $\text{Li}^+/\text{Li}$ .

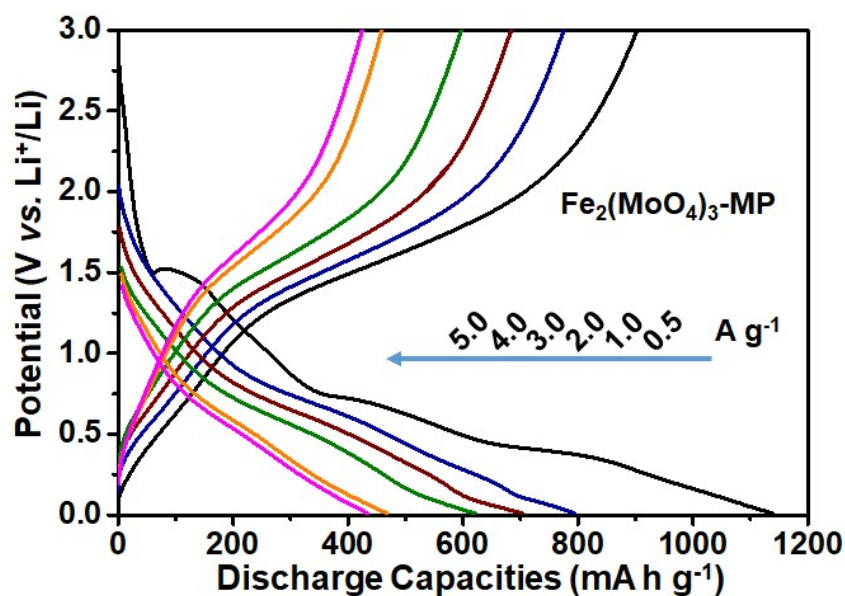

**Fig. S11** The discharge-charge voltage profiles of  $\text{Fe}_2(\text{MoO}_4)_3\text{-MP}$  at different current densities from 0.5 to  $5.0 \text{ A g}^{-1}$ .

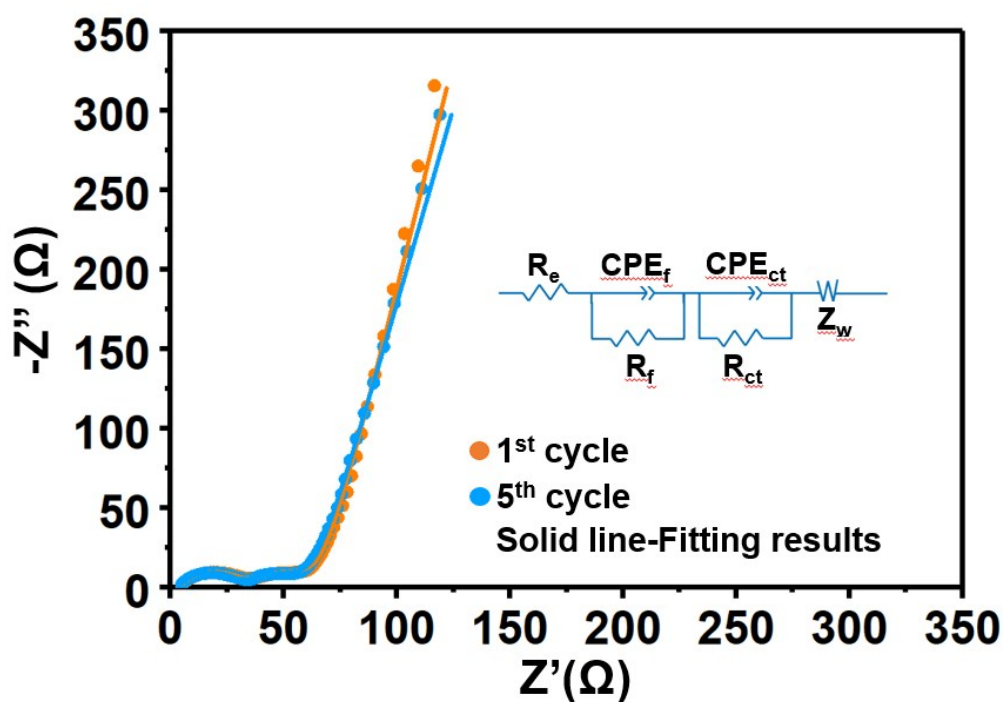

**Fig. S12** The typical Nyquist plots of  $\text{Fe}_2(\text{MoO}_4)_3/\text{C-NS}$  after different cycles.

**Table S1** The EIS of  $\text{Fe}_2(\text{MoO}_4)_3/\text{C-NS}$  electrode at fully charge/discharge states for the first, second, and third cycle.

| Discharge/charge                                  | $R_f$ ( $\Omega$ ) | $R_{ct}$ ( $\Omega$ ) |
|---------------------------------------------------|--------------------|-----------------------|
| Discharge to 0.01 V (after 1 <sup>st</sup> cycle) | 81.5               | 21.2                  |
| Charge to 3.0 V (after 1 <sup>st</sup> cycle)     | 26.5               | 65.2                  |
| Discharge to 0.01 V (after 2 <sup>nd</sup> cycle) | 81.5               | 38.1                  |
| Charge to 3.0 V (after 2 <sup>nd</sup> cycle)     | 11.0               | 63.8                  |
| Discharge to 0.01 V (after 3 <sup>rd</sup> cycle) | 75.3               | 34.3                  |
| Charge to 3.0 V (after 3 <sup>rd</sup> cycle)     | 12.9               | 43.8                  |
